# Supplementary material for: Composition-dependent photoconductivities in indium aluminium nitride nanorods grown by magnetron sputter epitaxy
Source: Royal Society of Chemistry journal article supplement (doi:10.1039/d2na00456a), 2022-01-01
Supplement: d2na00456a1.pdf [file d2na00456a1.pdf]

## Supplementary Information

### **Composition-dependent Photoconductivities in Indium Aluminium Nitride Nanorods Grown by Magnetron Sputter Epitaxy**

Bangolla Hemanth Kumar<sup>1</sup>, Ming-Deng Siao<sup>1</sup>, Yi-Hua Huang<sup>1</sup>, Ruei-San Chen<sup>1,\*</sup>, Agnė Žukauskaitė<sup>2</sup>, Justinas Palisaitis<sup>3</sup>, Per O. Å. Persson<sup>3</sup>, Lars Hultman<sup>3</sup>, Jens Birch<sup>3</sup> and Ching-Lien Hsiao<sup>3</sup>

<sup>1</sup>Graduate Institute of Applied Science and Technology, National Taiwan University of Science and Technology, Taipei 10607, Taiwan

<sup>2</sup>Fraunhofer Institute for Organic Electronics, Electron Beam and Plasma Technology FEP, Dresden 01277, Germany

<sup>3</sup>Thin Film Physics Division, Department of Physics, Chemistry, and Biology (IFM), Linköping University, Linköping SE-581 83, Sweden

\*Email: [rsc@mail.ntust.edu.tw](mailto:rsc@mail.ntust.edu.tw)

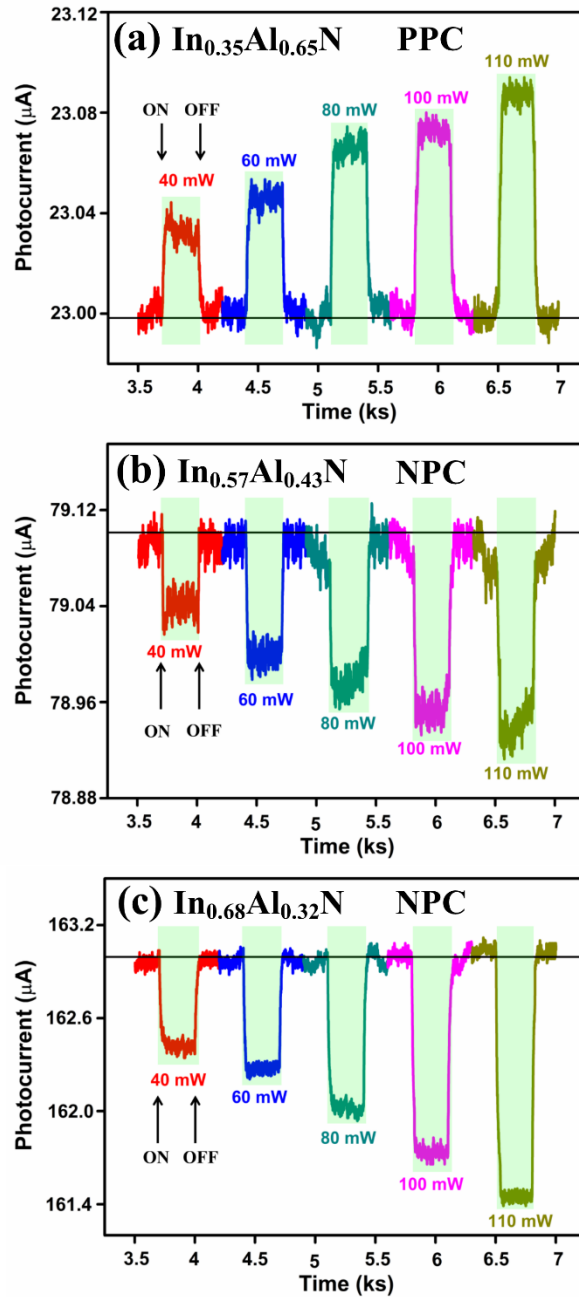

**Supplementary Figure 1.** Photocurrent response measurements of  $\text{In}_x\text{Al}_{1-x}\text{N}$  NR devices under different powers of green light illumination with the wavelength of 532 nm. The photocurrent measurements include dark current.
